# Supplementary material for: Silencing of one copy of the translation initiation factor eIFiso4G in Japanese plum (Prunus salicina) impacts susceptibility to Plum pox virus (PPV) and small RNA production
Source: PubMed Central journal article supplement (PMC6806492; doi:10.1186/s12870-019-2047-9), 2019-10-22

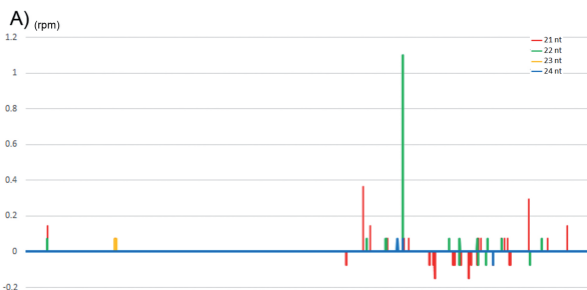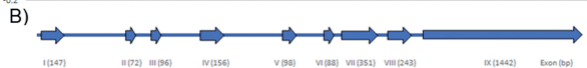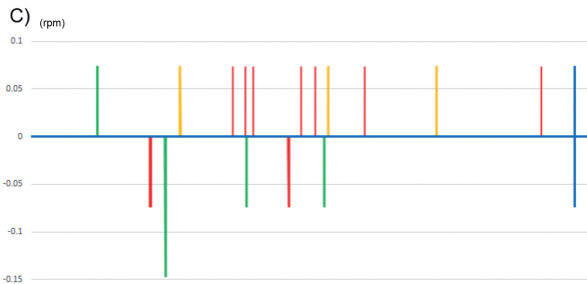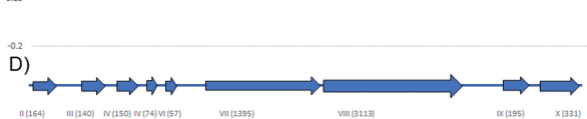

Supplement: 12870_2019_2047_MOESM3_ESM.pdf [file 12870_2019_2047_MOESM3_ESM.pdf]
