# Supplementary material for: Silencing of one copy of the translation initiation factor eIFiso4G in Japanese plum (Prunus salicina) impacts susceptibility to Plum pox virus (PPV) and small RNA production
Source: PubMed Central journal article supplement (PMC6806492; doi:10.1186/s12870-019-2047-9), 2019-10-22
Supplement: 12870_2019_2047_MOESM5_ESM.pdf [file 12870_2019_2047_MOESM5_ESM.pdf]

ppe-miR159  
 ppe-miR166a  
 ppe-miR166b  
 ppe-miR166c  
 ppe-miR166d  
 ppe-miR166e  
 ppe-miR172a-5p  
 ppe-miR395a-3p  
 ppe-miR395b-3p  
 ppe-miR395d  
 ppe-miR396b  
 ppe-miR398a-3p  
 ppe-miR398a-5p  
 ppe-miR398b  
 ppe-miR477a-3p  
 ppe-miR482b-5p  
 ppe-miR530  
 ppe-miR535a  
 ppe-miR535b  
 ppe-miR1511-3p

ppe-miR162  
 ppe-miR172a-3p  
 ppe-miR390  
 ppe-miR395e  
 ppe-miR397  
 ppe-miR828-3p  
 ppe-miR858  
 ppe-miR6263  
 ppe-miR6277  
 ppe-miR6287

ppe-miR395k  
 ppe-miR395l  
 ppe-miR395m  
 ppe-miR395n

ppe-miR827  
 ppe-miR6288a  
 ppe-miR7122a-3p  
 ppe-miR7125-3p

ppe-miR156g  
 ppe-miR395g  
 ppe-miR395c  
 ppe-miR395i

ppe-miR156i  
 ppe-miR171h  
 ppe-miR172d  
 ppe-miR396a  
 ppe-miR403  
 ppe-miR6280  
 ppe-miR6284  
 ppe-miR6293

**'Angeleno' WT, not-infected**

**'Angeleno' WT, infected with PPV-M**

**'Angeleno' WT, infected with PPV-D**

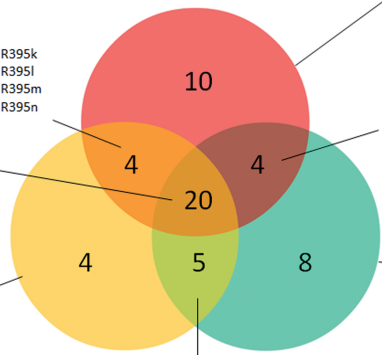

ppe-miR168  
 ppe-miR171d-3p  
 ppe-miR399a  
 ppe-miR477b-3p  
 ppe-miR6289
