# Supplementary material for: Silencing of one copy of the translation initiation factor eIFiso4G in Japanese plum (Prunus salicina) impacts susceptibility to Plum pox virus (PPV) and small RNA production
Source: BMC Plant Biol. 2019 Oct 22;19:440. doi: 10.1186/s12870-019-2047-9 (PMC6806492; doi:10.1186/s12870-019-2047-9)
Supplement: Supplementary file 7 — Additional file 7: Table S1. Summary of Japanese plum transformation and resistance testing. 1 Number of Prunus salicina explants treated with Agrobacterium tumefaciens. The constructs are corresponding to the ones depicted in Fig. 1a, except pBINPLUS/ARS-PpeiFiso4E for which we could not regenerate viable, transgenic clones. [file 12870_2019_2047_MOESM7_ESM.xlsx]

## Sheet: Table S1 Summary of tsfo
Table S1: Summary of Japanese plum transformation and resistance testing
Construct	Nb of explants 1	Nb of plantlets regenerated	NPTII positive	Nb of transgenic lines transferred to greenhouse	Nb of transgenic lines tested for response to PPV-M infection
pBINPLUS/ARS-PpeIF4E	800	20-40	14	14	7
pHG12-PpeIF4G			7	7	2
pHG12-PpeIF(iso)4G10			37	37	4
pHG12-PpeIF(iso)4G11			15	15	4
1 Number of Prunus salicina explants treated with Agrobacterium tumefaciens.
The constructs are corresponding to the ones depicted in Figure 1A, except pBINPLUS/ARS-PpeiFiso4E for which we could not regenerate viable, transgenic clones
