# Supplementary material for: Silencing of one copy of the translation initiation factor eIFiso4G in Japanese plum (Prunus salicina) impacts susceptibility to Plum pox virus (PPV) and small RNA production
Source: BMC Plant Biol. 2019 Oct 22;19:440. doi: 10.1186/s12870-019-2047-9 (PMC6806492; doi:10.1186/s12870-019-2047-9)
Supplement: Supplementary file 8 — Additional file 8: Table S2. Stem-loop reverse transcription-polymerase chain reaction (RT-PCR) detection of selected siRNAs and miRNAs. * Number indicates the number of reads issued from NGS for each siRNA molecule as depicted in Fig. 3. Loop primer: lower case fonts indicate complementary residues in the loop; bold, italic upper case indicate hybridizing sites for the reverse primer; double underlined fonts, residues hybridizing with the small RNA. Forward primer: double underlined fonts indicate residues hybridizing with the small RNA. wt: non-transformed, wild type ‘Angeleno’; AG7303–96: PpeIFiso4G11-silenced, transgenic ‘Angeleno’ Japanese plants. [file 12870_2019_2047_MOESM8_ESM.xlsx]

## Sheet: Stem loops
The Loop primer used for reverse transcription included a self-complimentary sequence (11-nt low case fonts), a complementary binding site for small RNA binding (6-nt double underline fonts), and a recognition site for the Reverse (PCR) primer (23-nt bold fonts). Forward primers used in the PCR step had the remaining 15 residues of the corresponding small RNA molecule (double underline fonts). De…
Table S2: Primer sequences and stem-loop reverse transcription-polymerase chain reaction (RT-PCR) detection of selected siRNAs and miRNAs
Non coding small RNA	Target sequence	Type of molecule	Size (nt)	Stem loop detection
				Loop primer	Forward primer	Reverse primer	Expected size (nt)	WT	WT / PPV-M	AG7303-96	AG7303-96 / PPV-M
PpeIFiso4G11-specific siRNA						GTGCAGGGTCCGAGGT		detected in
6260*	TCAGATGAGCCAGATGGAAAA	siRNA from hairpin	21	gtcgtatccagTGCAGGGTCCGAGGTATTCGCActggatacgacTTTTCC	GTATACTCAGATGAGCCAGAT		61			X	X
7291*	TGACTTCCCCTGAACAAGAGA	siRNA from hairpin	21	gtcgtatccagTGCAGGGTCCGAGGTATTCGCActggatacgacTCTCTT	GTATACTGACTTCCCCTGAAC		61			X	X
7361*	CCTGAACAAGAGATGGAGCGTAGG	siRNA from hairpin	24	gtcgtatccagTGCAGGGTCCGAGGTATTCGCActggatacgacCCTACG	GTATACCCTGAACAAGAGATG		64			X	X
8689*	CTGAACAAGAGATGGAGCGTA	siRNA from hairpin	21	gtcgtatccagTGCAGGGTCCGAGGTATTCGCActggatacgacTACGCT	GTATACCTGAACAAGAGATGG		61			X	X
miRNA differentially expressed in resistant/susceptible Japanese plum trees
ppe-miR171d-3p	CGAGCCGAATCAATATCACTC	microRNA	21	gtcgtatccagTGCAGGGTCCGAGGTATTCGCActggatacgacGAGTGA	GTATACCGAGCCGAATCAATA		61		X		X
ppe-miR399a	CGCCAAAGGAGAGTTGCCCTT	microRNA	21	gtcgtatccagTGCAGGGTCCGAGGTATTCGCActggatacgacAAGGGC	GTATACCGCCAAAGGAGAGTT		61		X
ppe-miR168	TCGCTTGGTGCAGGTCGGGAA	microRNA	21	gtcgtatccagTGCAGGGTCCGAGGTATTCGCActggatacgacTTCCCG	GTATACTCGCTTGGTGCAGGT		61		X
miRNA differentially expressed in wildtype and PpeIFiso4G11-silenced Japanese plum trees
ppe-miR156g	TTGACAGAAGATAGAGAGCAC	microRNA	21	gtcgtatccagTGCAGGGTCCGAGGTATTCGCActggatacgacGTGCTC	GTATACTTGACAGAAGATAGA		61			X
ppe-miR172a-3p	AGAATCTTGATGATGCTGCAT	microRNA	21	gtcgtatccagTGCAGGGTCCGAGGTATTCGCActggatacgacATGCAG	GTATACAGAATCTTGATGATG		61	X		X
Footnotes:
* Number indicates the number of reads issued from NGS for each siRNA molecule as depicted in Figure 3. Loop primer: lower case fonts indicate complementary residues in the loop; bold, italic upper case indicate hybridizing sites for the reverse primer; double underlined fonts, residues hybridizing with the small RNA. Forward primer: double underlined fonts indicate residues hybridizing with the …
