# Supplementary material for: Silencing of one copy of the translation initiation factor eIFiso4G in Japanese plum (Prunus salicina) impacts susceptibility to Plum pox virus (PPV) and small RNA production
Source: BMC Plant Biol. 2019 Oct 22;19:440. doi: 10.1186/s12870-019-2047-9 (PMC6806492; doi:10.1186/s12870-019-2047-9)
Supplement: Supplementary file 9 — Additional file 9: Table S3. Differentially expressed miRNA species and their targets in wild-type ‘Angeleno’ and in PpeIFiso4G11-silenced transgenic line. 1 Treatment refers to the non-infected (NI) to infected, with either PPV-M or PPV-D, status of the plants. 2 Genotype refers either to wild-type, non-transformed plum (‘Angeleno’ NT) or to AG7303–96 transgenic plants (named here ‘PpeIFiso4G11-silenced’). Total normalized reads were calculated dividing the number of total reads of a specific molecule by the total number of reads in the library. Expectation for target genes were obtained from the pSRNA software [51]. The NCBI link allows to retrieve the identity and true/putative function of each target protein. A) The most differentially expressed miRNA species in Prunus salicina ‘Angeleno’ wild-type (non-transgenic) plants. B) The most differentially expressed miRNA species in Prunus salicina ‘Angeleno’ PpeIFiso4G11-silenced plants. C) miRNA species uniquely expressed either in Prunus salicina ‘Angeleno’ wild-type or PpeIFiso4G11-silenced plants. [file 12870_2019_2047_MOESM9_ESM.xlsx]

## Sheet: Table S3A
Table S3A. The most differentially expressed miRNA species in Prunus salicina 'Angeleno' wild-type (non-transgenic) plants
miRNA name	Treatment 1	Reads per million	Target prediction	NCBI link	Expectation	Inhibition type
ppe-miR162	NI	1.94941	Prupe.2G200900.1	Prupe.2G200900.1	3	Cleavage
			Prupe.7G100800.2	Prupe.7G100800.2	3	Cleavage
			Prupe.7G100800.1	Prupe.7G100800.1	3	Cleavage
			Prupe.2G316400.1	Prupe.2G316400.1	3	Cleavage
ppe-miR172a-3p	NI	0.649805	Prupe.6G091100.2	Prupe.6G091100.2	0.5	Cleavage
			Prupe.6G091100.3	Prupe.6G091100.3	0.5	Cleavage
			Prupe.6G091100.1	Prupe.6G091100.1	0.5	Cleavage
			Prupe.2G220100.1	Prupe.2G220100.1	1.5	Cleavage
			Prupe.6G231700.2	Prupe.6G231700.2	1.5	Cleavage
			Prupe.6G242400.2	Prupe.6G242400.2	1.5	Cleavage
			Prupe.6G242400.1	Prupe.6G242400.1	1.5	Cleavage
			Prupe.6G231700.1	Prupe.6G231700.1	1.5	Cleavage
			Prupe.2G237700.2	Prupe.2G237700.2	2	Cleavage
			Prupe.2G237700.1	Prupe.2G237700.1	2	Cleavage
ppe-miR390	NI	1.94941	Prupe.6G048700.1	Prupe.6G048700.1	2.5	Translation
			Prupe.4G069200.6	Prupe.4G069200.6	2.5	Cleavage
			Prupe.4G069200.2	Prupe.4G069200.2	2.5	Cleavage
			Prupe.4G069200.4	Prupe.4G069200.4	2.5	Cleavage
			Prupe.4G069200.8	Prupe.4G069200.8	2.5	Cleavage
			Prupe.4G069200.7	Prupe.4G069200.7	2.5	Cleavage
			Prupe.4G069200.3	Prupe.4G069200.3	2.5	Cleavage
			Prupe.4G069200.1	Prupe.4G069200.1	2.5	Cleavage
			Prupe.4G069200.5	Prupe.4G069200.5	2.5	Cleavage
ppe-miR395e	NI	0.649805	Prupe.6G180000.1	Prupe.6G180000.1	1	Cleavage
			Prupe.1G023000.1	Prupe.1G023000.1	2	Cleavage
			Prupe.7G165800.1	Prupe.7G165800.1	2	Cleavage
			Prupe.1G511600.2	Prupe.1G511600.2	2	Cleavage
			Prupe.1G511600.1	Prupe.1G511600.1	2	Cleavage
ppe-miR397	NI	1.29961	Prupe.8G095000.1	Prupe.8G095000.1	0.5	Cleavage
			Prupe.8G095400.1	Prupe.8G095400.1	0.5	Cleavage
			Prupe.8G097000.1	Prupe.8G097000.1	0.5	Cleavage
			Prupe.6G271500.1	Prupe.6G271500.1	1	Cleavage
			Prupe.6G061300.1	Prupe.6G061300.1	1	Cleavage
			Prupe.6G072100.1	Prupe.6G072100.1	1.5	Cleavage
			Prupe.6G089100.1	Prupe.6G089100.1	1.5	Cleavage
			Prupe.5G231100.1	Prupe.5G231100.1	2	Cleavage
			Prupe.6G267700.1	Prupe.6G267700.1	2	Cleavage
			Prupe.7G156500.1	Prupe.7G156500.1	2	Cleavage
			Prupe.6G257700.1	Prupe.6G257700.1	2	Cleavage
			Prupe.6G258000.1	Prupe.6G258000.1	2	Cleavage
ppe-miR828-3p	NI	0.649805	Prupe.3G201200.1	Prupe.3G201200.1	2.5	Cleavage
			Prupe.1G002700.6	Prupe.1G002700.6	2.5	Cleavage
			Prupe.1G002700.5	Prupe.1G002700.5	2.5	Cleavage
			Prupe.1G002700.4	Prupe.1G002700.4	2.5	Cleavage
			Prupe.1G002700.2	Prupe.1G002700.2	2.5	Cleavage
			Prupe.1G002700.3	Prupe.1G002700.3	2.5	Cleavage
			Prupe.1G002700.1	Prupe.1G002700.1	2.5	Cleavage
			Prupe.4G088700.3	Prupe.4G088700.3	2.5	Cleavage
			Prupe.4G088700.6	Prupe.4G088700.6	2.5	Cleavage
			Prupe.4G088700.1	Prupe.4G088700.1	2.5	Cleavage
			Prupe.4G088700.4	Prupe.4G088700.4	2.5	Cleavage
			Prupe.4G088700.8	Prupe.4G088700.8	2.5	Cleavage
			Prupe.4G088700.5	Prupe.4G088700.5	2.5	Cleavage
			Prupe.4G088700.2	Prupe.4G088700.2	2.5	Cleavage
			Prupe.4G088700.7	Prupe.4G088700.7	2.5	Cleavage
ppe-miR858	NI	2.59922	Prupe.1G405100.1	Prupe.1G405100.1	1.5	Cleavage
			Prupe.1G405200.1	Prupe.1G405200.1	1.5	Cleavage
			Prupe.4G204800.1	Prupe.4G204800.1	2	Cleavage
			Prupe.4G204800.2	Prupe.4G204800.2	2	Cleavage
			Prupe.1G125300.1	Prupe.1G125300.1	2	Cleavage
ppe-miR6263	NI	0.649805	Prupe.1G217800.7	Prupe.1G217800.7	2	Cleavage
			Prupe.1G217800.3	Prupe.1G217800.3	2	Cleavage
			Prupe.1G217800.2	Prupe.1G217800.2	2	Cleavage
			Prupe.1G217800.6	Prupe.1G217800.6	2	Cleavage
			Prupe.1G217800.5	Prupe.1G217800.5	2	Cleavage
			Prupe.1G217800.4	Prupe.1G217800.4	2	Cleavage
			Prupe.1G524100.1	Prupe.1G524100.1	2	Cleavage
			Prupe.5G194900.1	Prupe.5G194900.1	2	Cleavage
			Prupe.5G194900.1	Prupe.5G194900.1	2	Cleavage
			Prupe.8G067400.1	Prupe.8G067400.1	2	Cleavage
			Prupe.1G226000.1	Prupe.1G226000.1	2	Cleavage
ppe-miR6277	NI	0.649805	Prupe.8G052600.6	Prupe.8G052600.6	2.5	Translation
			Prupe.8G052600.5	Prupe.8G052600.5	2.5	Translation
			Prupe.2G107000.1	Prupe.2G107000.1	2.5	Translation
			Prupe.2G107000.2	Prupe.2G107000.2	2.5	Translation
			Prupe.8G052600.7	Prupe.8G052600.7	2.5	Translation
			Prupe.1G111900.1	Prupe.1G111900.1	2.5	Cleavage
			Prupe.5G074300.1	Prupe.5G074300.1	2.5	Cleavage
			Prupe.7G074600.1	Prupe.7G074600.1	2.5	Cleavage
			Prupe.7G074400.1	Prupe.7G074400.1	2.5	Cleavage
			Prupe.7G074600.2	Prupe.7G074600.2	2.5	Cleavage
			Prupe.5G119300.1	Prupe.5G119300.1	2.5	Cleavage
ppe-miR6287	NI	0.649805	Prupe.3G166400.1	Prupe.3G166400.1	2	Cleavage
			Prupe.4G172900.1	Prupe.4G172900.1	2	Cleavage
			Prupe.2G261800.2	Prupe.2G261800.2	2	Cleavage
			Prupe.2G261800.1	Prupe.2G261800.1	2	Cleavage
miRNA name	Treatment 1	Reads per million	Target prediction	NCBI link	Expectation	Inhibition type
ppe-miR156g	PPV-M	1.84324	Prupe.3G308100.1	Prupe.3G308100.1	1	Cleavage
			Prupe.3G308100.2	Prupe.3G308100.2	1	Cleavage
			Prupe.1G224900.1	Prupe.1G224900.1	1.5	Cleavage
			Prupe.1G224900.2	Prupe.1G224900.2	1.5	Cleavage
			Prupe.1G224900.3	Prupe.1G224900.3	1.5	Cleavage
			Prupe.1G290200.2	Prupe.1G290200.2	1.5	Cleavage
			Prupe.7G074200.1	Prupe.7G074200.1	1.5	Cleavage
			Prupe.1G224900.5	Prupe.1G224900.5	1.5	Cleavage
			Prupe.1G290200.3	Prupe.1G290200.3	1.5	Cleavage
			Prupe.1G290200.5	Prupe.1G290200.5	1.5	Cleavage
			Prupe.1G290200.4	Prupe.1G290200.4	1.5	Cleavage
			Prupe.1G290200.6	Prupe.1G290200.6	1.5	Cleavage
			Prupe.1G290200.1	Prupe.1G290200.1	1.5	Cleavage
			Prupe.1G224900.4	Prupe.1G224900.4	1.5	Cleavage
			Prupe.6G256300.2	Prupe.6G256300.2	1.5	Cleavage
			Prupe.1G290200.7	Prupe.1G290200.7	1.5	Cleavage
			Prupe.6G256300.1	Prupe.6G256300.1	1.5	Cleavage
			Prupe.1G224900.6	Prupe.1G224900.6	1.5	Cleavage
			Prupe.4G050400.1	Prupe.4G050400.1	1.5	Cleavage
			Prupe.4G050400.2	Prupe.4G050400.2	1.5	Cleavage
ppe-miR395g	PPV-M	1.22883	Prupe.1G023000.1	Prupe.1G023000.1	2	Cleavage
			Prupe.7G165800.1	Prupe.7G165800.1	2	Cleavage
			Prupe.1G511600.2	Prupe.1G511600.2	2	Cleavage
			Prupe.1G511600.1	Prupe.1G511600.1	2	Cleavage
ppe-miR395c	PPV-M	0.614414	Prupe.6G180000.1	Prupe.6G180000.1	1	Cleavage
			Prupe.1G023000.1	Prupe.1G023000.1	2	Cleavage
			Prupe.7G165800.1	Prupe.7G165800.1	2	Cleavage
			Prupe.1G511600.2	Prupe.1G511600.2	2	Cleavage
			Prupe.1G511600.1	Prupe.1G511600.1	2	Cleavage
ppe-miR395i	PPV-M	0.614414	Prupe.6G180000.1	Prupe.6G180000.1	1	Cleavage
			Prupe.1G023000.1	Prupe.1G023000.1	2	Cleavage
			Prupe.7G165800.1	Prupe.7G165800.1	2	Cleavage
			Prupe.1G511600.2	Prupe.1G511600.2	2	Cleavage
			Prupe.1G511600.1	Prupe.1G511600.1	2	Cleavage
miRNA name	Treatment 1	Reads per million	Target prediction	NCBI link	Expectation	Inhibition type
ppe-miR156i	PPV-D	0.632689	Prupe.3G308100.1	Prupe.3G308100.1	1	Cleavage
	PPV-D		Prupe.3G308100.2	Prupe.3G308100.2	1	Cleavage
	PPV-D		Prupe.1G224900.1	Prupe.1G224900.1	1.5	Cleavage
	PPV-D		Prupe.1G224900.2	Prupe.1G224900.2	1.5	Cleavage
	PPV-D		Prupe.1G224900.3	Prupe.1G224900.3	1.5	Cleavage
	PPV-D		Prupe.1G290200.2	Prupe.1G290200.2	1.5	Cleavage
	PPV-D		Prupe.7G074200.1	Prupe.7G074200.1	1.5	Cleavage
	PPV-D		Prupe.1G224900.5	Prupe.1G224900.5	1.5	Cleavage
	PPV-D		Prupe.1G290200.3	Prupe.1G290200.3	1.5	Cleavage
	PPV-D		Prupe.1G290200.5	Prupe.1G290200.5	1.5	Cleavage
	PPV-D		Prupe.1G290200.4	Prupe.1G290200.4	1.5	Cleavage
	PPV-D		Prupe.1G290200.6	Prupe.1G290200.6	1.5	Cleavage
	PPV-D		Prupe.1G290200.1	Prupe.1G290200.1	1.5	Cleavage
	PPV-D		Prupe.1G224900.4	Prupe.1G224900.4	1.5	Cleavage
	PPV-D		Prupe.6G256300.2	Prupe.6G256300.2	1.5	Cleavage
	PPV-D		Prupe.1G290200.7	Prupe.1G290200.7	1.5	Cleavage
	PPV-D		Prupe.6G256300.1	Prupe.6G256300.1	1.5	Cleavage
	PPV-D		Prupe.1G224900.6	Prupe.1G224900.6	1.5	Cleavage
	PPV-D		Prupe.4G050400.1	Prupe.4G050400.1	1.5	Cleavage
	PPV-D		Prupe.4G050400.2	Prupe.4G050400.2	1.5	Cleavage
ppe-miR171h	PPV-D	0.632689	Prupe.2G138400.4	Prupe.2G138400.4	1	Cleavage
	PPV-D		Prupe.2G138400.3	Prupe.2G138400.3	1	Cleavage
	PPV-D		Prupe.2G138400.5	Prupe.2G138400.5	1	Cleavage
	PPV-D		Prupe.2G138400.6	Prupe.2G138400.6	1	Cleavage
	PPV-D		Prupe.2G138400.2	Prupe.2G138400.2	1	Cleavage
	PPV-D		Prupe.2G138400.1	Prupe.2G138400.1	1	Cleavage
	PPV-D		Prupe.5G072300.2	Prupe.5G072300.2	1	Cleavage
	PPV-D		Prupe.5G072300.1	Prupe.5G072300.1	1	Cleavage
	PPV-D		Prupe.2G223000.1	Prupe.2G223000.1	2.5	Cleavage
	PPV-D		Prupe.3G216400.1	Prupe.3G216400.1	2.5	Cleavage
ppe-miR172d	PPV-D	0.632689	Prupe.6G231700.2	Prupe.6G231700.2	0.5	Cleavage
	PPV-D		Prupe.6G242400.2	Prupe.6G242400.2	0.5	Cleavage
	PPV-D		Prupe.6G242400.1	Prupe.6G242400.1	0.5	Cleavage
	PPV-D		Prupe.6G231700.1	Prupe.6G231700.1	0.5	Cleavage
	PPV-D		Prupe.2G220100.1	Prupe.2G220100.1	0.5	Cleavage
	PPV-D		Prupe.6G091100.2	Prupe.6G091100.2	1	Cleavage
	PPV-D		Prupe.6G091100.3	Prupe.6G091100.3	1	Cleavage
	PPV-D		Prupe.6G091100.1	Prupe.6G091100.1	1	Cleavage
	PPV-D		Prupe.2G237700.2	Prupe.2G237700.2	2	Cleavage
	PPV-D		Prupe.2G237700.1	Prupe.2G237700.1	2	Cleavage
	PPV-D		Prupe.8G164200.1	Prupe.8G164200.1	2	Cleavage
	PPV-D		Prupe.8G164200.2	Prupe.8G164200.2	2	Cleavage
ppe-miR396a	PPV-D	1.89807	Prupe.7G248300.1	Prupe.7G248300.1	1.5	Cleavage
	PPV-D		Prupe.5G013100.1	Prupe.5G013100.1	2	Cleavage
	PPV-D		Prupe.5G013100.2	Prupe.5G013100.2	2	Cleavage
	PPV-D		Prupe.8G004200.4	Prupe.8G004200.4	2	Cleavage
	PPV-D		Prupe.8G004200.2	Prupe.8G004200.2	2	Cleavage
	PPV-D		Prupe.8G004200.1	Prupe.8G004200.1	2	Cleavage
	PPV-D		Prupe.8G004200.3	Prupe.8G004200.3	2	Cleavage
	PPV-D		Prupe.7G248400.4	Prupe.7G248400.4	2	Cleavage
	PPV-D		Prupe.7G248400.11	Prupe.7G248400.11	2	Cleavage
	PPV-D		Prupe.7G248400.15	Prupe.7G248400.15	2	Cleavage
	PPV-D		Prupe.7G248400.5	Prupe.7G248400.5	2	Cleavage
	PPV-D		Prupe.7G248400.13	Prupe.7G248400.13	2	Cleavage
	PPV-D		Prupe.7G248400.7	Prupe.7G248400.7	2	Cleavage
	PPV-D		Prupe.7G248400.3	Prupe.7G248400.3	2	Cleavage
	PPV-D		Prupe.7G248400.10	Prupe.7G248400.10	2	Cleavage
	PPV-D		Prupe.7G248400.12	Prupe.7G248400.12	2	Cleavage
	PPV-D		Prupe.7G248400.6	Prupe.7G248400.6	2	Cleavage
	PPV-D		Prupe.7G248400.8	Prupe.7G248400.8	2	Cleavage
	PPV-D		Prupe.7G248400.9	Prupe.7G248400.9	2	Cleavage
	PPV-D		Prupe.7G248400.1	Prupe.7G248400.1	2	Cleavage
	PPV-D		Prupe.6G165400.1	Prupe.6G165400.1	2	Cleavage
	PPV-D		Prupe.6G165100.1	Prupe.6G165100.1	2	Cleavage
ppe-miR403	PPV-D	1.26538	Prupe.5G093000.3	Prupe.5G093000.3	3	Cleavage
	PPV-D		Prupe.5G093000.2	Prupe.5G093000.2	3	Cleavage
	PPV-D		Prupe.5G093000.1	Prupe.5G093000.1	3	Cleavage
	PPV-D		Prupe.1G293300.1	Prupe.1G293300.1	3.5	Cleavage
	PPV-D		Prupe.1G293300.2	Prupe.1G293300.2	3.5	Cleavage
	PPV-D		Prupe.2G111400.1	Prupe.2G111400.1	3.5	Cleavage
	PPV-D		Prupe.8G048600.1	Prupe.8G048600.1	3.5	Cleavage
	PPV-D		Prupe.1G175500.1	Prupe.1G175500.1	3.5	Cleavage
	PPV-D		Prupe.1G181700.1	Prupe.1G181700.1	3.5	Cleavage
	PPV-D		Prupe.7G252600.1	Prupe.7G252600.1	3.5	Cleavage
	PPV-D		Prupe.7G018100.1	Prupe.7G018100.1	3.5	Cleavage
	PPV-D		Prupe.6G196300.3	Prupe.6G196300.3	3.5	Translation
	PPV-D		Prupe.6G196300.1	Prupe.6G196300.1	3.5	Translation
	PPV-D		Prupe.6G196300.2	Prupe.6G196300.2	3.5	Translation
	PPV-D		Prupe.3G136400.2	Prupe.3G136400.2	3.5	Translation
	PPV-D		Prupe.3G136400.1	Prupe.3G136400.1	3.5	Translation
	PPV-D		Prupe.7G054800.2	Prupe.7G054800.2	3.5	Cleavage
	PPV-D		Prupe.7G054800.3	Prupe.7G054800.3	3.5	Cleavage
	PPV-D		Prupe.7G054800.1	Prupe.7G054800.1	3.5	Cleavage
	PPV-D		Prupe.3G056100.1	Prupe.3G056100.1	3.5	Cleavage
	PPV-D		Prupe.1G331400.2	Prupe.1G331400.2	3.5	Translation
	PPV-D		Prupe.1G331400.1	Prupe.1G331400.1	3.5	Translation
	PPV-D		Prupe.7G126800.1	Prupe.7G126800.1	3.5	Cleavage
	PPV-D		Prupe.2G107500.1	Prupe.2G107500.1	3.5	Translation
ppe-miR6280	PPV-D	0.632689	Prupe.1G110300.1	Prupe.1G110300.1	2.5	Cleavage
	PPV-D		Prupe.1G232500.1	Prupe.1G232500.1	2.5	Cleavage
	PPV-D		Prupe.5G148900.2	Prupe.5G148900.2	2.5	Cleavage
	PPV-D		Prupe.5G148900.1	Prupe.5G148900.1	2.5	Cleavage
	PPV-D		Prupe.6G060400.1	Prupe.6G060400.1	2.5	Cleavage
	PPV-D		Prupe.1G390700.1	Prupe.1G390700.1	2.5	Cleavage
ppe-miR6284	PPV-D	0.632689	Prupe.4G155700.3	Prupe.4G155700.3	2.5	Cleavage
	PPV-D		Prupe.4G155700.4	Prupe.4G155700.4	2.5	Cleavage
	PPV-D		Prupe.4G155700.2	Prupe.4G155700.2	2.5	Cleavage
	PPV-D		Prupe.4G155700.1	Prupe.4G155700.1	2.5	Cleavage
	PPV-D		Prupe.6G222500.5	Prupe.6G222500.5	2.5	Cleavage
	PPV-D		Prupe.6G222500.4	Prupe.6G222500.4	2.5	Cleavage
	PPV-D		Prupe.6G222500.2	Prupe.6G222500.2	2.5	Cleavage
	PPV-D		Prupe.6G222500.3	Prupe.6G222500.3	2.5	Cleavage
	PPV-D		Prupe.6G222500.1	Prupe.6G222500.1	2.5	Cleavage
ppe-miR6293	PPV-D	0.632689	Prupe.8G120500.1	Prupe.8G120500.1	3	Cleavage
	PPV-D		Prupe.7G078300.1	Prupe.7G078300.1	3	Cleavage
	PPV-D		Prupe.1G051600.1	Prupe.1G051600.1	3	Cleavage
	PPV-D		Prupe.6G351100.1	Prupe.6G351100.1	3	Cleavage
	PPV-D		Prupe.1G528000.1	Prupe.1G528000.1	3	Cleavage
	PPV-D		Prupe.5G184700.1	Prupe.5G184700.1	3	Cleavage
	PPV-D		Prupe.3G035700.2	Prupe.3G035700.2	3	Cleavage
	PPV-D		Prupe.3G035700.1	Prupe.3G035700.1	3	Cleavage
	PPV-D		Prupe.3G035700.3	Prupe.3G035700.3	3	Cleavage
miRNA name	Treatment 1	Log2 (fold change)	Target prediction	NCBI link	Expectation	Inhibition type
ppe-miR395k	NI / PPV-M	-0.0807941	Prupe.6G180000.1	Prupe.6G180000.1	1	Cleavage
	NI / PPV-M		Prupe.1G023000.1	Prupe.1G023000.1	2	Cleavage
	NI / PPV-M		Prupe.7G165800.1	Prupe.7G165800.1	2	Cleavage
	NI / PPV-M		Prupe.1G511600.2	Prupe.1G511600.2	2	Cleavage
	NI / PPV-M		Prupe.1G511600.1	Prupe.1G511600.1	2	Cleavage
	NI / PPV-M		Prupe.3G029400.3	Prupe.3G029400.3	2.5	Cleavage
	NI / PPV-M		Prupe.3G029400.6	Prupe.3G029400.6	2.5	Cleavage
	NI / PPV-M		Prupe.3G029400.2	Prupe.3G029400.2	2.5	Cleavage
	NI / PPV-M		Prupe.3G029400.4	Prupe.3G029400.4	2.5	Cleavage
	NI / PPV-M		Prupe.3G029400.5	Prupe.3G029400.5	2.5	Cleavage
	NI / PPV-M		Prupe.3G029400.1	Prupe.3G029400.1	2.5	Cleavage
	NI / PPV-M		Prupe.7G071800.1	Prupe.7G071800.1	2.5	Cleavage
	NI / PPV-M		Prupe.1G299200.2	Prupe.1G299200.2	2.5	Cleavage
	NI / PPV-M		Prupe.1G299200.3	Prupe.1G299200.3	2.5	Cleavage
	NI / PPV-M		Prupe.1G299200.1	Prupe.1G299200.1	2.5	Cleavage
	NI / PPV-M		Prupe.6G109300.1	Prupe.6G109300.1	2.5	Cleavage
	NI / PPV-M		Prupe.6G056600.1	Prupe.6G056600.1	2.5	Cleavage
ppe-miR395l	NI / PPV-M	-1.08079	Prupe.6G180000.1	Prupe.6G180000.1	1	Cleavage
	NI / PPV-M		Prupe.1G023000.1	Prupe.1G023000.1	2	Cleavage
	NI / PPV-M		Prupe.7G165800.1	Prupe.7G165800.1	2	Cleavage
	NI / PPV-M		Prupe.1G511600.2	Prupe.1G511600.2	2	Cleavage
	NI / PPV-M		Prupe.1G511600.1	Prupe.1G511600.1	2	Cleavage
	NI / PPV-M		Prupe.3G029400.3	Prupe.3G029400.3	2.5	Cleavage
	NI / PPV-M		Prupe.3G029400.6	Prupe.3G029400.6	2.5	Cleavage
	NI / PPV-M		Prupe.3G029400.2	Prupe.3G029400.2	2.5	Cleavage
	NI / PPV-M		Prupe.3G029400.4	Prupe.3G029400.4	2.5	Cleavage
	NI / PPV-M		Prupe.3G029400.5	Prupe.3G029400.5	2.5	Cleavage
	NI / PPV-M		Prupe.3G029400.1	Prupe.3G029400.1	2.5	Cleavage
	NI / PPV-M		Prupe.7G071800.1	Prupe.7G071800.1	2.5	Cleavage
	NI / PPV-M		Prupe.1G299200.2	Prupe.1G299200.2	2.5	Cleavage
	NI / PPV-M		Prupe.1G299200.3	Prupe.1G299200.3	2.5	Cleavage
	NI / PPV-M		Prupe.1G299200.1	Prupe.1G299200.1	2.5	Cleavage
	NI / PPV-M		Prupe.6G109300.1	Prupe.6G109300.1	2.5	Cleavage
	NI / PPV-M		Prupe.6G056600.1	Prupe.6G056600.1	2.5	Cleavage
ppe-miR395m	NI / PPV-M	0.919206	Prupe.6G180000.1	Prupe.6G180000.1	1	Cleavage
	NI / PPV-M		Prupe.1G023000.1	Prupe.1G023000.1	2	Cleavage
	NI / PPV-M		Prupe.7G165800.1	Prupe.7G165800.1	2	Cleavage
	NI / PPV-M		Prupe.1G511600.2	Prupe.1G511600.2	2	Cleavage
	NI / PPV-M		Prupe.1G511600.1	Prupe.1G511600.1	2	Cleavage
	NI / PPV-M		Prupe.3G029400.3	Prupe.3G029400.3	2.5	Cleavage
	NI / PPV-M		Prupe.3G029400.6	Prupe.3G029400.6	2.5	Cleavage
	NI / PPV-M		Prupe.3G029400.2	Prupe.3G029400.2	2.5	Cleavage
	NI / PPV-M		Prupe.3G029400.4	Prupe.3G029400.4	2.5	Cleavage
	NI / PPV-M		Prupe.3G029400.5	Prupe.3G029400.5	2.5	Cleavage
	NI / PPV-M		Prupe.3G029400.1	Prupe.3G029400.1	2.5	Cleavage
	NI / PPV-M		Prupe.7G071800.1	Prupe.7G071800.1	2.5	Cleavage
	NI / PPV-M		Prupe.1G299200.2	Prupe.1G299200.2	2.5	Cleavage
	NI / PPV-M		Prupe.1G299200.3	Prupe.1G299200.3	2.5	Cleavage
	NI / PPV-M		Prupe.1G299200.1	Prupe.1G299200.1	2.5	Cleavage
	NI / PPV-M		Prupe.6G109300.1	Prupe.6G109300.1	2.5	Cleavage
ppe-miR395n	NI / PPV-M	-0.0807941	Prupe.6G180000.1	Prupe.6G180000.1	1	Cleavage
	NI / PPV-M		Prupe.1G023000.1	Prupe.1G023000.1	2	Cleavage
	NI / PPV-M		Prupe.7G165800.1	Prupe.7G165800.1	2	Cleavage
	NI / PPV-M		Prupe.1G511600.2	Prupe.1G511600.2	2	Cleavage
	NI / PPV-M		Prupe.1G511600.1	Prupe.1G511600.1	2	Cleavage
	NI / PPV-M		Prupe.3G029400.3	Prupe.3G029400.3	2.5	Cleavage
	NI / PPV-M		Prupe.3G029400.6	Prupe.3G029400.6	2.5	Cleavage
	NI / PPV-M		Prupe.3G029400.2	Prupe.3G029400.2	2.5	Cleavage
	NI / PPV-M		Prupe.3G029400.4	Prupe.3G029400.4	2.5	Cleavage
	NI / PPV-M		Prupe.3G029400.5	Prupe.3G029400.5	2.5	Cleavage
	NI / PPV-M		Prupe.3G029400.1	Prupe.3G029400.1	2.5	Cleavage
	NI / PPV-M		Prupe.7G071800.1	Prupe.7G071800.1	2.5	Cleavage
	NI / PPV-M		Prupe.1G299200.2	Prupe.1G299200.2	2.5	Cleavage
	NI / PPV-M		Prupe.1G299200.3	Prupe.1G299200.3	2.5	Cleavage
	NI / PPV-M		Prupe.1G299200.1	Prupe.1G299200.1	2.5	Cleavage
	NI / PPV-M		Prupe.6G109300.1	Prupe.6G109300.1	2.5	Cleavage
	NI / PPV-M		Prupe.6G056600.1	Prupe.6G056600.1	2.5	Cleavage
miRNA name	Treatment 1	Log2 (fold change)	Target prediction	NCBI link	Expectation	Inhibition type
ppe-miR827	NI / PPV-D	1.28342	Prupe.5G089200.4	Prupe.5G089200.4	1	Cleavage
	NI / PPV-D		Prupe.5G089200.1	Prupe.5G089200.1	1	Cleavage
	NI / PPV-D		Prupe.5G089200.2	Prupe.5G089200.2	1	Cleavage
	NI / PPV-D		Prupe.5G089200.3	Prupe.5G089200.3	1	Cleavage
	NI / PPV-D		Prupe.5G089200.5	Prupe.5G089200.5	1	Cleavage
	NI / PPV-D		Prupe.4G258300.3	Prupe.4G258300.3	1	Cleavage
	NI / PPV-D		Prupe.4G258300.2	Prupe.4G258300.2	1	Cleavage
	NI / PPV-D		Prupe.4G258300.1	Prupe.4G258300.1	1	Cleavage
	NI / PPV-D		Prupe.7G255800.2	Prupe.7G255800.2	2.5	Cleavage
	NI / PPV-D		Prupe.7G255800.1	Prupe.7G255800.1	2.5	Cleavage
	NI / PPV-D		Prupe.7G255800.3	Prupe.7G255800.3	2.5	Cleavage
ppe-miR6288a	NI / PPV-D	-0.0385093	Prupe.I004800.1	Prupe.I004800.1	1.5	Cleavage
	NI / PPV-D		Prupe.8G133800.1	Prupe.8G133800.1	1.5	Cleavage
	NI / PPV-D		Prupe.6G156800.1	Prupe.6G156800.1	1.5	Cleavage
	NI / PPV-D		Prupe.6G156800.2	Prupe.6G156800.2	1.5	Cleavage
ppe-miR7122a-3p	NI / PPV-D	-0.0385093	Prupe.1G406200.2	Prupe.1G406200.2	2	Cleavage
	NI / PPV-D		Prupe.1G406200.1	Prupe.1G406200.1	2	Cleavage
	NI / PPV-D		Prupe.6G281500.2	Prupe.6G281500.2	2	Translation
	NI / PPV-D		Prupe.6G281500.1	Prupe.6G281500.1	2	Translation
ppe-miR7125-3p	NI / PPV-D	-1.36044	Prupe.4G117200.1	Prupe.4G117200.1	1	Cleavage
	NI / PPV-D		Prupe.7G124600.1	Prupe.7G124600.1	2.5	Cleavage
	NI / PPV-D		Prupe.4G131500.1	Prupe.4G131500.1	3.5	Cleavage
	NI / PPV-D		Prupe.4G131600.1	Prupe.4G131600.1	3.5	Cleavage
	NI / PPV-D		Prupe.7G089500.4	Prupe.7G089500.4	3.5	Cleavage
	NI / PPV-D		Prupe.1G482500.1	Prupe.1G482500.1	3.5	Cleavage
	NI / PPV-D		Prupe.2G050500.1	Prupe.2G050500.1	3.5	Cleavage
	NI / PPV-D		Prupe.1G176000.1	Prupe.1G176000.1	3.5	Cleavage
	NI / PPV-D		Prupe.8G077500.1	Prupe.8G077500.1	3.5	Cleavage
miRNA name	Treatment 1	Log2 (fold change)	Target prediction	NCBI link	Expectation	Inhibition type
ppe-miR168	PPV-M / PPV-D	1.36421	Prupe.6G014400.5	Prupe.6G014400.5	2.5	Cleavage
	PPV-M / PPV-D		Prupe.6G014400.4	Prupe.6G014400.4	2.5	Cleavage
	PPV-M / PPV-D		Prupe.6G014400.3	Prupe.6G014400.3	2.5	Cleavage
	PPV-M / PPV-D		Prupe.6G014400.2	Prupe.6G014400.2	2.5	Cleavage
	PPV-M / PPV-D		Prupe.6G014400.1	Prupe.6G014400.1	2.5	Cleavage
	PPV-M / PPV-D		Prupe.2G233000.2	Prupe.2G233000.2	2.5	Cleavage
	PPV-M / PPV-D		Prupe.2G233000.1	Prupe.2G233000.1	2.5	Cleavage
	PPV-M / PPV-D		Prupe.5G241600.4	Prupe.5G241600.4	2.5	Cleavage
	PPV-M / PPV-D		Prupe.5G241600.2	Prupe.5G241600.2	2.5	Cleavage
	PPV-M / PPV-D		Prupe.5G241600.3	Prupe.5G241600.3	2.5	Cleavage
	PPV-M / PPV-D		Prupe.5G241600.1	Prupe.5G241600.1	2.5	Cleavage
	PPV-M / PPV-D		Prupe.2G003400.2	Prupe.2G003400.2	3.5	Cleavage
	PPV-M / PPV-D		Prupe.2G003400.3	Prupe.2G003400.3	3.5	Cleavage
	PPV-M / PPV-D		Prupe.2G003400.4	Prupe.2G003400.4	3.5	Cleavage
	PPV-M / PPV-D		Prupe.2G003400.1	Prupe.2G003400.1	3.5	Cleavage
ppe-miR171d-3p	PPV-M / PPV-D	1.84964	Prupe.1G501500.1	Prupe.1G501500.1	1.5	Cleavage
	PPV-M / PPV-D		Prupe.7G008600.1	Prupe.7G008600.1	3	Cleavage
ppe-miR399a	PPV-M / PPV-D	2.92981	Prupe.2G266200.1	Prupe.2G266200.1	1.5	Cleavage
	PPV-M / PPV-D		Prupe.4G066200.1	Prupe.4G066200.1	2	Cleavage
ppe-miR477b-3p	PPV-M / PPV-D	-3.93957	Prupe.7G145100.2	Prupe.7G145100.2	3.5	Translation
	PPV-M / PPV-D		Prupe.7G145100.1	Prupe.7G145100.1	3.5	Translation
	PPV-M / PPV-D		Prupe.7G005000.6	Prupe.7G005000.6	3.5	Cleavage
	PPV-M / PPV-D		Prupe.7G005000.3	Prupe.7G005000.3	3.5	Cleavage
	PPV-M / PPV-D		Prupe.7G005000.2	Prupe.7G005000.2	3.5	Cleavage
	PPV-M / PPV-D		Prupe.7G005000.4	Prupe.7G005000.4	3.5	Cleavage
	PPV-M / PPV-D		Prupe.7G005000.5	Prupe.7G005000.5	3.5	Cleavage
	PPV-M / PPV-D		Prupe.7G005000.1	Prupe.7G005000.1	3.5	Cleavage
	PPV-M / PPV-D		Prupe.1G521400.2	Prupe.1G521400.2	3.5	Cleavage
	PPV-M / PPV-D		Prupe.1G521400.1	Prupe.1G521400.1	3.5	Cleavage
	PPV-M / PPV-D		Prupe.7G178400.1	Prupe.7G178400.1	3.5	Cleavage
	PPV-M / PPV-D		Prupe.8G117900.1	Prupe.8G117900.1	3.5	Cleavage
	PPV-M / PPV-D		Prupe.1G030500.1	Prupe.1G030500.1	3.5	Cleavage
	PPV-M / PPV-D		Prupe.4G201200.2	Prupe.4G201200.2	3.5	Cleavage
	PPV-M / PPV-D		Prupe.4G201200.1	Prupe.4G201200.1	3.5	Cleavage
	PPV-M / PPV-D		Prupe.2G051300.4	Prupe.2G051300.4	3.5	Translation
	PPV-M / PPV-D		Prupe.2G051300.3	Prupe.2G051300.3	3.5	Translation
	PPV-M / PPV-D		Prupe.2G051300.5	Prupe.2G051300.5	3.5	Translation
	PPV-M / PPV-D		Prupe.1G018700.1	Prupe.1G018700.1	3.5	Cleavage
	PPV-M / PPV-D		Prupe.2G051300.6	Prupe.2G051300.6	3.5	Translation
	PPV-M / PPV-D		Prupe.3G053800.3	Prupe.3G053800.3	3.5	Cleavage
	PPV-M / PPV-D		Prupe.6G273100.1	Prupe.6G273100.1	3.5	Cleavage
	PPV-M / PPV-D		Prupe.2G051300.2	Prupe.2G051300.2	3.5	Translation
	PPV-M / PPV-D		Prupe.5G170100.1	Prupe.5G170100.1	3.5	Cleavage
	PPV-M / PPV-D		Prupe.3G053800.1	Prupe.3G053800.1	3.5	Cleavage
	PPV-M / PPV-D		Prupe.3G259200.1	Prupe.3G259200.1	3.5	Cleavage
	PPV-M / PPV-D		Prupe.2G051300.1	Prupe.2G051300.1	3.5	Translation
	PPV-M / PPV-D		Prupe.3G053800.2	Prupe.3G053800.2	3.5	Cleavage
	PPV-M / PPV-D		Prupe.3G259200.2	Prupe.3G259200.2	3.5	Cleavage
	PPV-M / PPV-D		Prupe.2G062400.2	Prupe.2G062400.2	3.5	Translation
	PPV-M / PPV-D		Prupe.8G120400.1	Prupe.8G120400.1	3.5	Cleavage
	PPV-M / PPV-D		Prupe.8G108800.1	Prupe.8G108800.1	3.5	Cleavage
	PPV-M / PPV-D		Prupe.2G063600.1	Prupe.2G063600.1	3.5	Translation
	PPV-M / PPV-D		Prupe.8G109500.1	Prupe.8G109500.1	3.5	Cleavage
	PPV-M / PPV-D		Prupe.2G062400.1	Prupe.2G062400.1	3.5	Translation
	PPV-M / PPV-D		Prupe.8G109200.1	Prupe.8G109200.1	3.5	Cleavage
	PPV-M / PPV-D		Prupe.8G108500.1	Prupe.8G108500.1	3.5	Cleavage
	PPV-M / PPV-D		Prupe.5G239200.1	Prupe.5G239200.1	3.5	Cleavage
	PPV-M / PPV-D		Prupe.6G062700.1	Prupe.6G062700.1	3.5	Cleavage
	PPV-M / PPV-D		Prupe.6G348300.1	Prupe.6G348300.1	3.5	Translation
	PPV-M / PPV-D		Prupe.2G175200.2	Prupe.2G175200.2	3.5	Cleavage
	PPV-M / PPV-D		Prupe.1G291100.1	Prupe.1G291100.1	3.5	Cleavage
	PPV-M / PPV-D		Prupe.2G175200.1	Prupe.2G175200.1	3.5	Cleavage
	PPV-M / PPV-D		Prupe.8G019300.1	Prupe.8G019300.1	3.5	Translation
	PPV-M / PPV-D		Prupe.8G211700.1	Prupe.8G211700.1	3.5	Cleavage
	PPV-M / PPV-D		Prupe.2G084900.1	Prupe.2G084900.1	3.5	Cleavage
	PPV-M / PPV-D		Prupe.5G146300.1	Prupe.5G146300.1	3.5	Cleavage
	PPV-M / PPV-D		Prupe.7G076100.1	Prupe.7G076100.1	3.5	Translation
	PPV-M / PPV-D		Prupe.6G005900.1	Prupe.6G005900.1	3.5	Cleavage
	PPV-M / PPV-D		Prupe.1G400300.1	Prupe.1G400300.1	3.5	Translation
	PPV-M / PPV-D		Prupe.8G098300.1	Prupe.8G098300.1	3.5	Cleavage
	PPV-M / PPV-D		Prupe.1G400600.1	Prupe.1G400600.1	3.5	Translation
	PPV-M / PPV-D		Prupe.1G489300.2	Prupe.1G489300.2	3.5	Translation
	PPV-M / PPV-D		Prupe.1G489300.1	Prupe.1G489300.1	3.5	Translation
	PPV-M / PPV-D		Prupe.4G114500.1	Prupe.4G114500.1	3.5	Cleavage
ppe-miR6289	PPV-M / PPV-D	1.04228	Prupe.8G085000.1	Prupe.8G085000.1	2	Cleavage
	PPV-M / PPV-D		Prupe.7G079200.1	Prupe.7G079200.1	2.5	Cleavage
	PPV-M / PPV-D		Prupe.6G017500.1	Prupe.6G017500.1	2.5	Cleavage
	PPV-M / PPV-D		Prupe.2G170100.1	Prupe.2G170100.1	2.5	Cleavage
	PPV-M / PPV-D		Prupe.2G170100.2	Prupe.2G170100.2	2.5	Cleavage

## Sheet: Table S3B
Table S3B. The most differentially expressed miRNA species in Prunus salicina 'Angeleno' PpeIFiso4G11-silenced plants
miRNA name	Treatment 1	Reads per million	Target prediction	NCBI link	Expectation	Inhibition type
ppe-miR393b	NI	1.24504	Prupe.3G311800.1	Prupe.3G311800.1	1	Cleavage
			Prupe.8G253300.1	Prupe.8G253300.1	1	Cleavage
			Prupe.5G123100.1	Prupe.5G123100.1	2.5	Cleavage
			Prupe.2G308900.2	Prupe.2G308900.2	2.5	Cleavage
			Prupe.2G308900.1	Prupe.2G308900.1	2.5	Cleavage
miRNA name	Treatment 1	Reads per million	Target prediction	NCBI link	Expectation	Inhibition type
ppe-miR162	PPV-M	1.59094	Prupe.2G200900.1	Prupe.2G200900.1	3	Cleavage
			Prupe.7G100800.2	Prupe.7G100800.2	3	Cleavage
			Prupe.7G100800.1	Prupe.7G100800.1	3	Cleavage
			Prupe.2G316400.1	Prupe.2G316400.1	3	Cleavage
ppe-miR168	PPV-M	1.90913	Prupe.6G014400.5	Prupe.6G014400.5	2.5	Cleavage
			Prupe.6G014400.4	Prupe.6G014400.4	2.5	Cleavage
			Prupe.6G014400.3	Prupe.6G014400.3	2.5	Cleavage
			Prupe.6G014400.2	Prupe.6G014400.2	2.5	Cleavage
			Prupe.6G014400.1	Prupe.6G014400.1	2.5	Cleavage
			Prupe.2G233000.2	Prupe.2G233000.2	2.5	Cleavage
			Prupe.2G233000.1	Prupe.2G233000.1	2.5	Cleavage
			Prupe.5G241600.4	Prupe.5G241600.4	2.5	Cleavage
			Prupe.5G241600.2	Prupe.5G241600.2	2.5	Cleavage
			Prupe.5G241600.3	Prupe.5G241600.3	2.5	Cleavage
			Prupe.5G241600.1	Prupe.5G241600.1	2.5	Cleavage
ppe-miR171d-3p	PPV-M	2.86369	Prupe.1G501500.1	Prupe.1G501500.1	1.5	Cleavage
			Prupe.7G008600.1	Prupe.7G008600.1	3	Cleavage
miRNA name	Treatment 1	Reads per million	Target prediction	NCBI link	Expectation	Inhibition type
ppe-miR171e	PPV-D	1.57844	Prupe.1G347000.1	Prupe.1G347000.1	3.5	Cleavage
			Prupe.1G291800.1	Prupe.1G291800.1	3.5	Cleavage
			Prupe.1G291500.1	Prupe.1G291500.1	3.5	Cleavage
			Prupe.4G049400.1	Prupe.4G049400.1	3.5	Cleavage
			Prupe.2G045200.3	Prupe.2G045200.3	3.5	Cleavage
			Prupe.2G045200.2	Prupe.2G045200.2	3.5	Cleavage
			Prupe.2G045200.1	Prupe.2G045200.1	3.5	Cleavage
			Prupe.2G260700.2	Prupe.2G260700.2	3.5	Cleavage
			Prupe.2G260700.1	Prupe.2G260700.1	3.5	Cleavage
ppe-miR7122a-3p	PPV-D	1.4657	Prupe.1G406200.2	Prupe.1G406200.2	2	Cleavage
			Prupe.1G406200.1	Prupe.1G406200.1	2	Cleavage
			Prupe.6G281500.2	Prupe.6G281500.2	2	Translation
			Prupe.6G281500.1	Prupe.6G281500.1	2	Translation
			Prupe.7G064900.1	Prupe.7G064900.1	2.5	Cleavage
			Prupe.8G199700.2	Prupe.8G199700.2	2.5	Cleavage
			Prupe.8G199700.1	Prupe.8G199700.1	2.5	Cleavage
miRNA name	Treatment 1	Log2 (fold change)	Target prediction	NCBI link	Expectation	Inhibition type
ppe-miR390	NI / PPV-D	-0.225582	Prupe.6G048700.1	Prupe.6G048700.1	2.5	Translation
			Prupe.4G069200.6	Prupe.4G069200.6	2.5	Cleavage
			Prupe.4G069200.2	Prupe.4G069200.2	2.5	Cleavage
			Prupe.4G069200.4	Prupe.4G069200.4	2.5	Cleavage
			Prupe.4G069200.8	Prupe.4G069200.8	2.5	Cleavage
			Prupe.4G069200.7	Prupe.4G069200.7	2.5	Cleavage
			Prupe.4G069200.3	Prupe.4G069200.3	2.5	Cleavage
			Prupe.4G069200.1	Prupe.4G069200.1	2.5	Cleavage
			Prupe.4G069200.5	Prupe.4G069200.5	2.5	Cleavage
ppe-miR403	NI / PPV-D	-0.748423	Prupe.5G093000.3	Prupe.5G093000.3	3	Cleavage
			Prupe.5G093000.2	Prupe.5G093000.2	3	Cleavage
			Prupe.5G093000.1	Prupe.5G093000.1	3	Cleavage
			Prupe.1G293300.1	Prupe.1G293300.1	3.5	Cleavage
			Prupe.1G293300.2	Prupe.1G293300.2	3.5	Cleavage
			Prupe.2G111400.1	Prupe.2G111400.1	3.5	Cleavage
			Prupe.8G048600.1	Prupe.8G048600.1	3.5	Cleavage
			Prupe.1G175500.1	Prupe.1G175500.1	3.5	Cleavage
			Prupe.1G181700.1	Prupe.1G181700.1	3.5	Cleavage
			Prupe.7G252600.1	Prupe.7G252600.1	3.5	Cleavage
			Prupe.7G018100.1	Prupe.7G018100.1	3.5	Cleavage
			Prupe.6G196300.3	Prupe.6G196300.3	3.5	Translation
			Prupe.6G196300.1	Prupe.6G196300.1	3.5	Translation
			Prupe.6G196300.2	Prupe.6G196300.2	3.5	Translation
			Prupe.3G136400.2	Prupe.3G136400.2	3.5	Translation
			Prupe.3G136400.1	Prupe.3G136400.1	3.5	Translation
			Prupe.7G054800.2	Prupe.7G054800.2	3.5	Cleavage
			Prupe.7G054800.3	Prupe.7G054800.3	3.5	Cleavage
			Prupe.7G054800.1	Prupe.7G054800.1	3.5	Cleavage
			Prupe.3G056100.1	Prupe.3G056100.1	3.5	Cleavage
			Prupe.1G331400.2	Prupe.1G331400.2	3.5	Translation
			Prupe.1G331400.1	Prupe.1G331400.1	3.5	Translation
			Prupe.7G126800.1	Prupe.7G126800.1	3.5	Cleavage
			Prupe.2G107500.1	Prupe.2G107500.1	3.5	Translation
ppe-miR482e	NI / PPV-D	0.0919	Prupe.2G059200.1	Prupe.2G059200.1	1	Cleavage
			Prupe.3G093000.1	Prupe.3G093000.1	1.5	Cleavage
			Prupe.3G093000.1	Prupe.3G093000.1	1.5	Cleavage
ppe-miR482f	NI / PPV-D	0.129375	Prupe.3G080600.1	Prupe.3G080600.1	1.5	Cleavage
			Prupe.3G080600.1	Prupe.3G080600.1	1.5	Cleavage
			Prupe.6G031500.6	Prupe.6G031500.6	2	Translation
			Prupe.6G031500.1	Prupe.6G031500.1	2	Translation
			Prupe.6G031500.5	Prupe.6G031500.5	2	Translation
			Prupe.6G031500.3	Prupe.6G031500.3	2	Translation
			Prupe.6G031500.4	Prupe.6G031500.4	2	Translation
			Prupe.6G031500.2	Prupe.6G031500.2	2	Translation
			Prupe.7G052600.4	Prupe.7G052600.4	2	Cleavage
			Prupe.7G052600.2	Prupe.7G052600.2	2	Cleavage
			Prupe.7G052600.3	Prupe.7G052600.3	2	Cleavage
			Prupe.7G052600.1	Prupe.7G052600.1	2	Cleavage
ppe-miR827	NI / PPV-D	-2.5333	Prupe.5G089200.4	Prupe.5G089200.4	1	Cleavage
			Prupe.5G089200.1	Prupe.5G089200.1	1	Cleavage
			Prupe.5G089200.2	Prupe.5G089200.2	1	Cleavage
			Prupe.5G089200.3	Prupe.5G089200.3	1	Cleavage
			Prupe.5G089200.5	Prupe.5G089200.5	1	Cleavage
			Prupe.4G258300.3	Prupe.4G258300.3	1	Cleavage
			Prupe.4G258300.2	Prupe.4G258300.2	1	Cleavage
			Prupe.4G258300.1	Prupe.4G258300.1	1	Cleavage
			Prupe.7G255800.2	Prupe.7G255800.2	2.5	Cleavage
			Prupe.7G255800.1	Prupe.7G255800.1	2.5	Cleavage
			Prupe.7G255800.3	Prupe.7G255800.3	2.5	Cleavage
ppe-miR6284	NI / PPV-D	-0.377585	Prupe.4G155700.3	Prupe.4G155700.3	2.5	Cleavage
			Prupe.4G155700.4	Prupe.4G155700.4	2.5	Cleavage
			Prupe.4G155700.2	Prupe.4G155700.2	2.5	Cleavage
			Prupe.4G155700.1	Prupe.4G155700.1	2.5	Cleavage
			Prupe.6G222500.5	Prupe.6G222500.5	2.5	Cleavage
			Prupe.6G222500.4	Prupe.6G222500.4	2.5	Cleavage
			Prupe.6G222500.2	Prupe.6G222500.2	2.5	Cleavage
			Prupe.6G222500.3	Prupe.6G222500.3	2.5	Cleavage
			Prupe.6G222500.1	Prupe.6G222500.1	2.5	Cleavage
miRNA name	Treatment 1	Log2 (fold change)	Target prediction	NCBI link	Expectation	Inhibition type
ppe-miR477a-3p	PPV-M / PPV-D	-0.39727	Prupe.4G041800.1	Prupe.4G041800.1	2.5	Translation
			Prupe.2G085700.1	Prupe.2G085700.1	2.5	Cleavage
			Prupe.2G085200.1	Prupe.2G085200.1	2.5	Cleavage
			Prupe.6G331000.3	Prupe.6G331000.3	2.5	Cleavage
			Prupe.6G331000.2	Prupe.6G331000.2	2.5	Cleavage
			Prupe.6G331000.1	Prupe.6G331000.1	2.5	Cleavage
			Prupe.4G160000.1	Prupe.4G160000.1	2.5	Cleavage
			Prupe.1G373800.2	Prupe.1G373800.2	2.5	Cleavage
			Prupe.1G373800.3	Prupe.1G373800.3	2.5	Cleavage
			Prupe.1G373800.1	Prupe.1G373800.1	2.5	Cleavage
			Prupe.1G373800.4	Prupe.1G373800.4	2.5	Cleavage
			Prupe.2G190700.2	Prupe.2G190700.2	2.5	Cleavage
			Prupe.2G190700.3	Prupe.2G190700.3	2.5	Cleavage
			Prupe.1G373800.5	Prupe.1G373800.5	2.5	Cleavage
			Prupe.2G190700.1	Prupe.2G190700.1	2.5	Cleavage
			Prupe.2G028400.2	Prupe.2G028400.2	2.5	Cleavage
			Prupe.2G028400.1	Prupe.2G028400.1	2.5	Cleavage
			Prupe.7G145100.2	Prupe.7G145100.2	3.5	Translation
			Prupe.7G145100.1	Prupe.7G145100.1	3.5	Translation
			Prupe.7G005000.6	Prupe.7G005000.6	3.5	Cleavage
			Prupe.7G005000.3	Prupe.7G005000.3	3.5	Cleavage
			Prupe.7G005000.2	Prupe.7G005000.2	3.5	Cleavage
			Prupe.7G005000.4	Prupe.7G005000.4	3.5	Cleavage
			Prupe.7G005000.5	Prupe.7G005000.5	3.5	Cleavage
			Prupe.7G005000.1	Prupe.7G005000.1	3.5	Cleavage
			Prupe.1G521400.2	Prupe.1G521400.2	3.5	Cleavage
			Prupe.1G521400.1	Prupe.1G521400.1	3.5	Cleavage
			Prupe.7G178400.1	Prupe.7G178400.1	3.5	Cleavage
			Prupe.8G117900.1	Prupe.8G117900.1	3.5	Cleavage
			Prupe.1G030500.1	Prupe.1G030500.1	3.5	Cleavage
			Prupe.4G201200.2	Prupe.4G201200.2	3.5	Cleavage
			Prupe.4G201200.1	Prupe.4G201200.1	3.5	Cleavage
			Prupe.2G051300.4	Prupe.2G051300.4	3.5	Translation
			Prupe.2G051300.3	Prupe.2G051300.3	3.5	Translation
			Prupe.2G051300.5	Prupe.2G051300.5	3.5	Translation
			Prupe.1G018700.1	Prupe.1G018700.1	3.5	Cleavage
			Prupe.2G051300.6	Prupe.2G051300.6	3.5	Translation
			Prupe.3G053800.3	Prupe.3G053800.3	3.5	Cleavage
			Prupe.6G273100.1	Prupe.6G273100.1	3.5	Cleavage
			Prupe.2G051300.2	Prupe.2G051300.2	3.5	Translation
			Prupe.5G170100.1	Prupe.5G170100.1	3.5	Cleavage
			Prupe.3G053800.1	Prupe.3G053800.1	3.5	Cleavage
			Prupe.3G259200.1	Prupe.3G259200.1	3.5	Cleavage
			Prupe.2G051300.1	Prupe.2G051300.1	3.5	Translation
			Prupe.3G053800.2	Prupe.3G053800.2	3.5	Cleavage
			Prupe.3G259200.2	Prupe.3G259200.2	3.5	Cleavage
			Prupe.2G062400.2	Prupe.2G062400.2	3.5	Translation
			Prupe.8G120400.1	Prupe.8G120400.1	3.5	Cleavage
			Prupe.8G108800.1	Prupe.8G108800.1	3.5	Cleavage
			Prupe.2G063600.1	Prupe.2G063600.1	3.5	Translation
			Prupe.8G109500.1	Prupe.8G109500.1	3.5	Cleavage
			Prupe.2G062400.1	Prupe.2G062400.1	3.5	Translation
			Prupe.8G109200.1	Prupe.8G109200.1	3.5	Cleavage
			Prupe.8G108500.1	Prupe.8G108500.1	3.5	Cleavage
			Prupe.5G239200.1	Prupe.5G239200.1	3.5	Cleavage
			Prupe.6G062700.1	Prupe.6G062700.1	3.5	Cleavage
			Prupe.6G348300.1	Prupe.6G348300.1	3.5	Translation
			Prupe.2G175200.2	Prupe.2G175200.2	3.5	Cleavage
			Prupe.1G291100.1	Prupe.1G291100.1	3.5	Cleavage
			Prupe.2G175200.1	Prupe.2G175200.1	3.5	Cleavage
			Prupe.8G019300.1	Prupe.8G019300.1	3.5	Translation
			Prupe.8G211700.1	Prupe.8G211700.1	3.5	Cleavage
			Prupe.2G084900.1	Prupe.2G084900.1	3.5	Cleavage
			Prupe.5G146300.1	Prupe.5G146300.1	3.5	Cleavage
			Prupe.7G076100.1	Prupe.7G076100.1	3.5	Translation
			Prupe.6G005900.1	Prupe.6G005900.1	3.5	Cleavage
			Prupe.1G400300.1	Prupe.1G400300.1	3.5	Translation
			Prupe.8G098300.1	Prupe.8G098300.1	3.5	Cleavage
			Prupe.1G400600.1	Prupe.1G400600.1	3.5	Translation
			Prupe.1G489300.2	Prupe.1G489300.2	3.5	Translation
			Prupe.1G489300.1	Prupe.1G489300.1	3.5	Translation
			Prupe.4G114500.1	Prupe.4G114500.1	3.5	Cleavage
ppe-miR477b-3p	PPV-M / PPV-D	-0.496805	Prupe.7G145100.2	Prupe.7G145100.2	3.5	Translation
			Prupe.7G145100.1	Prupe.7G145100.1	3.5	Translation
			Prupe.7G005000.6	Prupe.7G005000.6	3.5	Cleavage
			Prupe.7G005000.3	Prupe.7G005000.3	3.5	Cleavage
			Prupe.7G005000.2	Prupe.7G005000.2	3.5	Cleavage
			Prupe.7G005000.4	Prupe.7G005000.4	3.5	Cleavage
			Prupe.7G005000.5	Prupe.7G005000.5	3.5	Cleavage
			Prupe.7G005000.1	Prupe.7G005000.1	3.5	Cleavage
			Prupe.1G521400.2	Prupe.1G521400.2	3.5	Cleavage
			Prupe.1G521400.1	Prupe.1G521400.1	3.5	Cleavage
			Prupe.7G178400.1	Prupe.7G178400.1	3.5	Cleavage
			Prupe.8G117900.1	Prupe.8G117900.1	3.5	Cleavage
			Prupe.1G030500.1	Prupe.1G030500.1	3.5	Cleavage
			Prupe.4G201200.2	Prupe.4G201200.2	3.5	Cleavage
			Prupe.4G201200.1	Prupe.4G201200.1	3.5	Cleavage
			Prupe.2G051300.4	Prupe.2G051300.4	3.5	Translation
			Prupe.2G051300.3	Prupe.2G051300.3	3.5	Translation
			Prupe.2G051300.5	Prupe.2G051300.5	3.5	Translation
			Prupe.1G018700.1	Prupe.1G018700.1	3.5	Cleavage
			Prupe.2G051300.6	Prupe.2G051300.6	3.5	Translation
			Prupe.3G053800.3	Prupe.3G053800.3	3.5	Cleavage
			Prupe.6G273100.1	Prupe.6G273100.1	3.5	Cleavage
			Prupe.2G051300.2	Prupe.2G051300.2	3.5	Translation
			Prupe.5G170100.1	Prupe.5G170100.1	3.5	Cleavage
			Prupe.3G053800.1	Prupe.3G053800.1	3.5	Cleavage
			Prupe.3G259200.1	Prupe.3G259200.1	3.5	Cleavage
			Prupe.2G051300.1	Prupe.2G051300.1	3.5	Translation
			Prupe.3G053800.2	Prupe.3G053800.2	3.5	Cleavage
			Prupe.3G259200.2	Prupe.3G259200.2	3.5	Cleavage
			Prupe.2G062400.2	Prupe.2G062400.2	3.5	Translation
			Prupe.8G120400.1	Prupe.8G120400.1	3.5	Cleavage
			Prupe.8G108800.1	Prupe.8G108800.1	3.5	Cleavage
			Prupe.2G063600.1	Prupe.2G063600.1	3.5	Translation
			Prupe.8G109500.1	Prupe.8G109500.1	3.5	Cleavage
			Prupe.2G062400.1	Prupe.2G062400.1	3.5	Translation
			Prupe.8G109200.1	Prupe.8G109200.1	3.5	Cleavage
			Prupe.8G108500.1	Prupe.8G108500.1	3.5	Cleavage
			Prupe.5G239200.1	Prupe.5G239200.1	3.5	Cleavage
			Prupe.6G062700.1	Prupe.6G062700.1	3.5	Cleavage
			Prupe.6G348300.1	Prupe.6G348300.1	3.5	Translation
			Prupe.2G175200.2	Prupe.2G175200.2	3.5	Cleavage
			Prupe.1G291100.1	Prupe.1G291100.1	3.5	Cleavage
			Prupe.2G175200.1	Prupe.2G175200.1	3.5	Cleavage
			Prupe.8G019300.1	Prupe.8G019300.1	3.5	Translation
			Prupe.8G211700.1	Prupe.8G211700.1	3.5	Cleavage
			Prupe.2G084900.1	Prupe.2G084900.1	3.5	Cleavage
			Prupe.5G146300.1	Prupe.5G146300.1	3.5	Cleavage
			Prupe.7G076100.1	Prupe.7G076100.1	3.5	Translation
			Prupe.6G005900.1	Prupe.6G005900.1	3.5	Cleavage
			Prupe.1G400300.1	Prupe.1G400300.1	3.5	Translation
			Prupe.8G098300.1	Prupe.8G098300.1	3.5	Cleavage
			Prupe.1G400600.1	Prupe.1G400600.1	3.5	Translation
			Prupe.1G489300.2	Prupe.1G489300.2	3.5	Translation
			Prupe.1G489300.1	Prupe.1G489300.1	3.5	Translation
			Prupe.4G114500.1	Prupe.4G114500.1	3.5	Cleavage
ppe-miR535a	PPV-M / PPV-D	-1.13424	Prupe.8G098000.1	Prupe.8G098000.1	3.5	Translation
			Prupe.8G098000.2	Prupe.8G098000.2	3.5	Translation
			Prupe.8G170200.1	Prupe.8G170200.1	3.5	Cleavage
			Prupe.1G414200.1	Prupe.1G414200.1	3.5	Cleavage
			Prupe.7G100600.1	Prupe.7G100600.1	3.5	Cleavage
			Prupe.5G117600.1	Prupe.5G117600.1	3.5	Cleavage
			Prupe.5G117600.2	Prupe.5G117600.2	3.5	Cleavage
			Prupe.6G089600.1	Prupe.6G089600.1	3.5	Cleavage
			Prupe.6G089600.2	Prupe.6G089600.2	3.5	Cleavage
			Prupe.8G025400.1	Prupe.8G025400.1	3.5	Cleavage
			Prupe.1G306600.1	Prupe.1G306600.1	3.5	Cleavage
			Prupe.1G306600.2	Prupe.1G306600.2	3.5	Cleavage
			Prupe.3G230600.1	Prupe.3G230600.1	3.5	Cleavage
			Prupe.3G230500.1	Prupe.3G230500.1	3.5	Cleavage
			Prupe.3G230400.1	Prupe.3G230400.1	3.5	Cleavage
			Prupe.4G139600.1	Prupe.4G139600.1	3.5	Cleavage
			Prupe.4G139600.7	Prupe.4G139600.7	3.5	Cleavage
			Prupe.4G139600.4	Prupe.4G139600.4	3.5	Cleavage
			Prupe.4G139600.2	Prupe.4G139600.2	3.5	Cleavage
			Prupe.4G139600.6	Prupe.4G139600.6	3.5	Cleavage
			Prupe.8G263900.1	Prupe.8G263900.1	3.5	Cleavage
			Prupe.4G139600.3	Prupe.4G139600.3	3.5	Cleavage
			Prupe.4G139600.5	Prupe.4G139600.5	3.5	Cleavage
			Prupe.5G152800.1	Prupe.5G152800.1	3.5	Cleavage
			Prupe.5G152800.2	Prupe.5G152800.2	3.5	Cleavage
			Prupe.5G152800.3	Prupe.5G152800.3	3.5	Cleavage
			Prupe.2G011700.2	Prupe.2G011700.2	3.5	Cleavage
			Prupe.2G011700.1	Prupe.2G011700.1	3.5	Cleavage
			Prupe.2G117000.1	Prupe.2G117000.1	3.5	Translation
			Prupe.6G360700.1	Prupe.6G360700.1	3.5	Cleavage
ppe-miR3627-5p	PPV-M / PPV-D	2.92946	Prupe.2G306000.1	Prupe.2G306000.1	3	Translation
			Prupe.1G339200.2	Prupe.1G339200.2	3	Translation
			Prupe.7G056500.1	Prupe.7G056500.1	3	Cleavage

## Sheet: Table S3C
Table S3C. miRNA species uniquely expressed either in Prunus salicina 'Angeleno' wild-type or PpeIFiso4G11-silenced plants
miRNA name	Genotype 2	Total normalized reads	Target prediction	NCBI link	Expectation	Inhibition type	Predicted function
ppe-miR172a-3p	'Angeleno' NT	1	Prupe.6G091100.2	Prupe.6G091100.2	0.5	Cleavage	Ppe ethylene-responsive transcription factor RAP2-7
		1	Prupe.2G220100.1	Prupe.2G220100.1	1.5	Cleavage	Ppe AP2-like ethylene-responsive transcription factor TOE3
		1	Prupe.6G231700.2	Prupe.6G231700.2	1.5	Cleavage	Ppe floral homeotic protein APETALA 2
		1	Prupe.6G242400.2	Prupe.6G242400.2	1.5	Cleavage	Ppe AP2-like ethylene-responsive transcription factor TOE3
ppe-miR828-3p	'Angeleno' NT	1	Prupe.3G201200.1	Prupe.3G201200.1	2.5	Cleavage	Ppe pentatricopeptide repeat-containing protein At5g65560
		1	Prupe.1G002700.6	Prupe.1G002700.6	2.5	Cleavage	Ath Protein kinase superfamily protein
		1	Prupe.4G088700.3	Prupe.4G088700.3	2.5	Cleavage	Gma nitrate regulatory gene2 protein
ppe-miR858	'Angeleno' NT	2.6	Prupe.1G405100.1	Prupe.1G405100.1	1.5	Cleavage	Ppe trichome differentiation protein GL1
		2.6	Prupe.4G204800.1	Prupe.4G204800.1	2	Cleavage	Ppe transcription factor TT2
		2.6	Prupe.1G125300.1	Prupe.1G125300.1	2	Cleavage	Ppe transcription factor MYB111
ppe-miR6263	'Angeleno' NT	1	Prupe.1G217800.7	Prupe.1G217800.7	2	Cleavage	Gma CC-NBS-LRR class disease resistance protein isoform X1
		1	Prupe.1G226000.1	Prupe.1G226000.1	2	Cleavage	Ppe REF/SRPP-like protein At1g67360
ppe-miR6277	'Angeleno' NT	1	Prupe.8G052600.6	Prupe.8G052600.6	2.5	Translation	Ath D-lactate dehydrogenase (DUF668)
		1	Prupe.2G107000.1	Prupe.2G107000.1	2.5	Translation	Ppe chromo domain-containing protein LHP1
		1	Prupe.8G052600.7	Prupe.8G052600.7	2.5	Translation	Ath D-lactate dehydrogenase (DUF668)
		1	Prupe.1G111900.1	Prupe.1G111900.1	2.5	Cleavage	Ppe gibberellin 2-beta-dioxygenase 2
		1	Prupe.5G074300.1	Prupe.5G074300.1	2.5	Cleavage	Ath T-box transcription factor, putative (DUF863)
		1	Prupe.7G074600.1	Prupe.7G074600.1	2.5	Cleavage	Ath Cysteine/Histidine-rich C1 domain family protein
		1	Prupe.5G119300.1	Prupe.5G119300.1	2.5	Cleavage	Ppe RING-H2 finger protein ATL22 isoform X1
ppe-miR6287	'Angeleno' NT	1	Prupe.4G172900.1	Prupe.4G172900.1	2	Cleavage	Ppe protein SAWADEE HOMEODOMAIN HOMOLOG 2
		1	Prupe.2G261800.1	Prupe.2G261800.1	2	Cleavage	Ppe phosphoglucan phosphatase LSF2, chloroplastic
ppe-miR6288a	'Angeleno' NT	1	Prupe.8G133800.1	Prupe.8G133800.1	1.5	Cleavage	Ath ubiquitin 8
		1	Prupe.6G156800.1	Prupe.6G156800.1	1.5	Cleavage	Ppe COP9 signalosome complex subunit 2
		1	Prupe.6G156800.2	Prupe.6G156800.2	1.5	Cleavage	Ath proteasome family protein
miRNA name	Genotype 2	Total normalized reads	Target prediction	NCBI link	Expectation	Inhibition type	Predicted function
ppe-miR156h	PpeIFiso4G11-silenced	1.83	Prupe.3G308100.1	Prupe.3G308100.1	1	Cleavage	Ppe squamosa promoter-binding-like protein 13A
		1.83	Prupe.1G224900.1	Prupe.1G224900.1	1.5	Cleavage	Ppe squamosa promoter-binding-like protein 2
		1.83	Prupe.7G074200.1	Prupe.7G074200.1	1.5	Cleavage	Ppe squamosa promoter-binding-like protein 9
		1.83	Prupe.1G290200.3	Prupe.1G290200.3	1.5	Cleavage	Ppe squamosa promoter-binding-like protein 6
		1.83	Prupe.6G256300.2	Prupe.6G256300.2	1.5	Cleavage	Ppe squamosa promoter-binding-like protein 9
		1.83	Prupe.4G050400.1	Prupe.4G050400.1	1.5	Cleavage	Ppe squamosa promoter-binding-like protein 3
ppe-miR167c	PpeIFiso4G11-silenced	2.12	Prupe.8G167100.3	Prupe.8G167100.3	3	Translation	Ppe probable ubiquitin-conjugating enzyme E2 23
		2.12	Prupe.2G290200.1	Prupe.2G290200.1	3	Cleavage	Ppe protein DETOXIFICATION 49
		2.12	Prupe.6G122800.4	Prupe.6G122800.4	3	Translation	Ppe serine/threonine-protein kinase D6PK
		2.12	Prupe.6G063600.1	Prupe.6G063600.1	3	Cleavage	Ppe neutral ceramidase
		2.12	Prupe.3G011800.1	Prupe.3G011800.1	3.5	Cleavage	Gma auxin response factor 8 isoform X2
		2.12	Prupe.3G182900.5	Prupe.3G182900.5	3.5	Cleavage	Ppe auxin response factor 6
		2.12	Prupe.4G085900.2	Prupe.4G085900.2	3.5	Cleavage	Ppe auxin response factor 6
		2.12	Prupe.5G145400.2	Prupe.5G145400.2	3.5	Cleavage	Ath ATP/DNA binding protein
		2.12	Prupe.1G173900.1	Prupe.1G173900.1	3.5	Cleavage	Ppe 60S acidic ribosomal protein P0
		2.12	Prupe.4G264300.1	Prupe.4G264300.1	3.5	Cleavage	Ath Ribonuclease H-like superfamily protein
		2.12	Prupe.4G043500.1	Prupe.4G043500.1	3.5	Translation	Ppe RNA polymerase II C-terminal domain phosphatase-like 1
		2.12	Prupe.8G105200.1	Prupe.8G105200.1	3.5	Translation	Ath RING/U-box superfamily protein
		2.12	Prupe.5G157700.1	Prupe.5G157700.1	3.5	Cleavage	Ppe RING-H2 finger protein ATL47
		2.12	Prupe.4G140600.7	Prupe.4G140600.7	3.5	Cleavage	Ppe BTB/POZ domain-containing protein At1g04390
		2.12	Prupe.6G153900.1	Prupe.6G153900.1	3.5	Cleavage	Ppe molybdopterin biosynthesis protein CNX1
		2.12	Prupe.3G164900.2	Prupe.3G164900.2	3.5	Cleavage	Ppe potassium channel SKOR
		2.12	Prupe.6G047700.1	Prupe.6G047700.1	3.5	Cleavage	Ath cation/hydrogen exchanger 15
		2.12	Prupe.8G150800.3	Prupe.8G150800.3	3.5	Cleavage	Ath ATP phosphoribosyltransferase regulatory subunit
		2.12	Prupe.6G021000.1	Prupe.6G021000.1	3.5	Cleavage	Ppe G-type lectin S-receptor-like serine/threonine-protein kinase LECRK3
		2.12	Prupe.7G028700.2	Prupe.7G028700.2	3.5	Cleavage	Ppe probable mediator of RNA polymerase II transcription subunit 26b
ppe-miR393b	PpeIFiso4G11-silenced	1.24	Prupe.3G311800.1	Prupe.3G311800.1	1	Cleavage	Ppe protein AUXIN SIGNALING F-BOX 2
		1.24	Prupe.8G253300.1	Prupe.8G253300.1	1	Cleavage	Ppe protein TRANSPORT INHIBITOR RESPONSE 1
		1.24	Prupe.5G123100.1	Prupe.5G123100.1	2.5	Cleavage	Ath Glutaredoxin family protein
		1.24	Prupe.2G308900.2	Prupe.2G308900.2	2.5	Cleavage	Ppe protein RKD4
ppe-miR395f	PpeIFiso4G11-silenced	1.46	Prupe.6G180000.1	Prupe.6G180000.1	1	Cleavage	Ppe sulfate transporter 2.1
		1.46	Prupe.1G023000.1	Prupe.1G023000.1	2	Cleavage	Ppe ATP sulfurylase 1, chloroplastic
		1.46	Prupe.7G165800.1	Prupe.7G165800.1	2	Cleavage	Ath Pentatricopeptide repeat (PPR-like) superfamily protein
		1.46	Prupe.1G511600.1	Prupe.1G511600.1	2	Cleavage	Ppe Pentatricopeptide repeat (PPR-like) superfamily protein
ppe-miR395h	PpeIFiso4G11-silenced	1.39	Prupe.6G180000.1	Prupe.6G180000.1	1	Cleavage	Ppe sulfate transporter 2.1
		1.39	Prupe.1G023000.1	Prupe.1G023000.1	2	Cleavage	Ppe ATP sulfurylase 1, chloroplastic
		1.39	Prupe.7G165800.1	Prupe.7G165800.1	2	Cleavage	Ath Pentatricopeptide repeat (PPR-like) superfamily protein
		1.39	Prupe.1G511600.1	Prupe.1G511600.1	2	Cleavage	Ppe low affinity sulfate transporter 4
ppe-miR395j	PpeIFiso4G11-silenced	1.98	Prupe.6G180000.1	Prupe.6G180000.1	1	Cleavage	Ppe sulfate transporter 2.1
		1.98	Prupe.1G023000.1	Prupe.1G023000.1	2	Cleavage	Ppe ATP sulfurylase 1, chloroplastic
		1.98	Prupe.7G165800.1	Prupe.7G165800.1	2	Cleavage	Ath Pentatricopeptide repeat (PPR-like) superfamily protein
		1.98	Prupe.1G511600.2	Prupe.1G511600.2	2	Cleavage	Ppe low affinity sulfate transporter 4
ppe-miR482b-3p	PpeIFiso4G11-silenced	15.31	Prupe.7G063800.1	Prupe.7G063800.1	1.5	Cleavage	Gma putative disease resistance protein RGA1
		15.31	Prupe.2G246900.1	Prupe.2G246900.1	2	Cleavage	Ath Fasciclin-like arabinogalactan family protein
		15.31	Prupe.6G243600.1	Prupe.6G243600.1	2	Cleavage	Gma disease resistance protein RGA2
ppe-miR482c-3p	PpeIFiso4G11-silenced	2.56	Prupe.3G246200.1	Prupe.3G246200.1	2	Cleavage	Gma receptor-like protein kinase FERONIA isoform X1
		2.56	Prupe.6G087900.1	Prupe.6G087900.1	2	Cleavage	Ppe receptor-like protein kinase HERK 1
		2.56	Prupe.3G246200.1	Prupe.3G246200.1	2	Cleavage	Ath Malectin/receptor-like protein kinase family protein
		2.56	Prupe.2G051100.1	Prupe.2G051100.1	3	Cleavage	Gma putative disease resistance RPP13-like protein 1
		2.56	Prupe.4G286000.3	Prupe.4G286000.3	3	Cleavage	Ppe putative disease resistance RPP13-like protein 1
		2.56	Prupe.6G029400.1	Prupe.6G029400.1	3	Translation	Ppe uridine kinase-like protein 3
		2.56	Prupe.2G046000.1	Prupe.2G046000.1	3	Cleavage	Ppe putative disease resistance RPP13-like protein 1
		2.56	Prupe.2G127500.1	Prupe.2G127500.1	3	Cleavage	Ath hydroxyproline-rich glycoprotein family protein
		2.56	Prupe.1G345900.1	Prupe.1G345900.1	3	Cleavage	Ppe alanine--tRNA ligase
		2.56	Prupe.4G148300.2	Prupe.4G148300.2	3	Cleavage	Ppe protein TRIGALACTOSYLDIACYLGLYCEROL 1, chloroplastic
		2.56	Prupe.2G051100.1	Prupe.2G051100.1	3	Cleavage	Gma putative disease resistance RPP13-like protein 1
		2.56	Prupe.2G046300.1	Prupe.2G046300.1	3	Cleavage	Gma putative disease resistance RPP13-like protein 1
		2.56	Prupe.2G052200.1	Prupe.2G052200.1	3	Cleavage	Gma PREDICTED: putative disease resistance RPP13-like protein 1
		2.56	Prupe.4G286000.1	Prupe.4G286000.1	3	Cleavage	Ppe putative disease resistance RPP13-like protein 1
		2.56	Prupe.2G046000.1	Prupe.2G046000.1	3	Cleavage	Ppe putative disease resistance RPP13-like protein 1
		2.56	Prupe.6G029400.1	Prupe.6G029400.1	3	Cleavage	Ppe uridine kinase-like protein 3
		2.56	Prupe.3G247400.1	Prupe.3G247400.1	3	Cleavage	Ppe protein ABHD17B
ppe-miR482e	PpeIFiso4G11-silenced	1.9	Prupe.2G059200.1	Prupe.2G059200.1	1	Cleavage	Ppe TMV resistance protein N
		1.9	Prupe.3G093000.1	Prupe.3G093000.1	1.5	Cleavage	Ppe putative disease resistance protein RGA1
ppe-miR482f	PpeIFiso4G11-silenced	2.78	Prupe.3G080600.1	Prupe.3G080600.1	1.5	Cleavage	Ath putative disease resistance protein RGA1
		2.78	Prupe.6G031500.1	Prupe.6G031500.1	2	Translation	Ppe subtilisin-like protease SBT5.4
		2.78	Prupe.7G052600.1	Prupe.7G052600.1	2	Cleavage	Ath Heat shock protein DnaJ with tetratricopeptide repeat-containing protein
ppe-miR7122a-5p	PpeIFiso4G11-silenced	215.98	Prupe.8G027800.1	Prupe.8G027800.1	2.5	Cleavage	Ath RNA processing FACTOR
		215.98	Prupe.2G024600.1	Prupe.2G024600.1	2.5	Cleavage	Ppe protein transport protein SEC31 homolog B
		215.98	Prupe.8G027800.1	Prupe.8G027800.1	2.5	Translation	Ath RNA processing FACTOR
		215.98	Prupe.3G138000.1	Prupe.3G138000.1	3	Cleavage	Ath Tetratricopeptide repeat (TPR)-like superfamily protein
		215.98	Prupe.6G223700.1	Prupe.6G223700.1	3	Cleavage	Ppe protein PHLOEM PROTEIN 2-LIKE A1
		215.98	Prupe.3G138000.1	Prupe.3G138000.1	3	Translation	Ath Tetratricopeptide repeat (TPR)-like superfamily protein
